# Supplementary material for: Synthesis & Evaluation of Novel Mannosylated Neoglycolipids for Liposomal Delivery System Applications
Source: MDPI journal article supplement (doi:10.3390/pharmaceutics14112300), 2022-10-26
Supplement: s1 [file s1]

## Supplementary Information

# Synthesis & Evaluation of Novel Mannosylated Neoglycolipids for Liposomal Delivery System Applications

Leila Mousavifar <sup>1,†</sup>, Jordan D. Lewicky <sup>2,†</sup>, Alexis Taponard <sup>1</sup>, Rahul Bagul <sup>1</sup>, Madleen Rivat <sup>1</sup>, Shuay Abdullayev <sup>1</sup>, Alexandrine L. Martel <sup>2</sup>, Nya L. Fraleigh <sup>2</sup>, Arnaldo Nakamura <sup>3</sup>, Frédéric J. Veyrier <sup>3</sup>, Hoang-Thanh Le <sup>2,4,\*</sup> and René Roy <sup>1,\*</sup>

<sup>1</sup> Glycosciences and Nanomaterial Laboratory, Université du Québec à Montréal, P.O. Box 8888, Succ. Centre-Ville, Montréal, QC H3C 3P8, Canada

<sup>2</sup> Health Sciences North Research Institute, 56 Walford Road, Sudbury, ON P3E 2H2, Canada

<sup>3</sup> Armand-Frappier Santé Biotechnologie Research Centre, Institut National de la Recherche Scientifique, 531 Boulevard des Prairies, Laval, QC H7V 1B7, Canada

<sup>4</sup> Medicinal Sciences Division, NOSM University, 935 Ramsey Lake Road, Sudbury, ON P3E 2C6, Canada

\* Correspondence: [hle@hsnsudbury.ca](mailto:hle@hsnsudbury.ca) or [hle@hsnri.ca](mailto:hle@hsnri.ca) (H.-T.L.); [roy.rene@uqam.ca](mailto:roy.rene@uqam.ca) (R.R.)

† These authors contributed equally to this work.

## NMR Spectra:

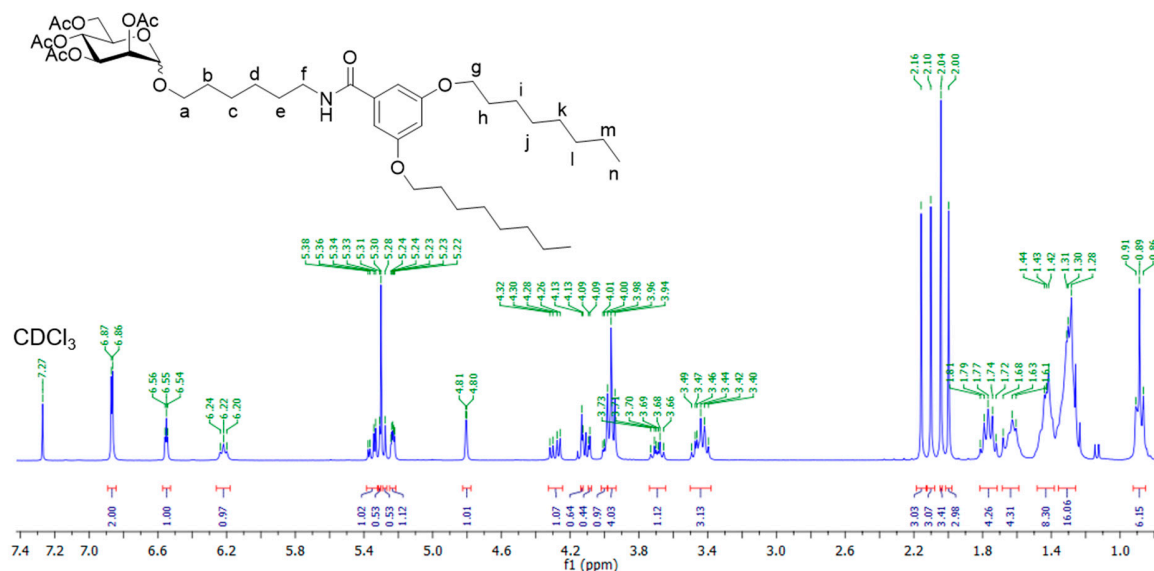

Figure S1. <sup>1</sup>H-NMR (300 MHz, CDCl<sub>3</sub>) of compound 16.

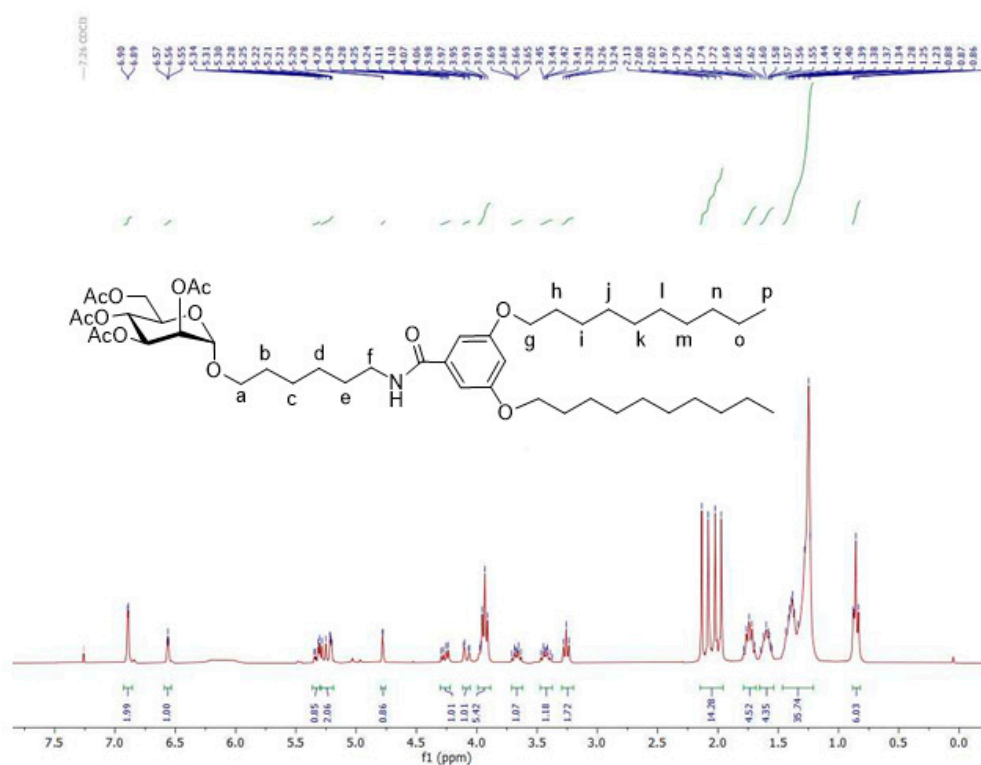

**Figure S2.** <sup>1</sup>H-NMR (300 MHz, CDCl<sub>3</sub>) of compound 17.

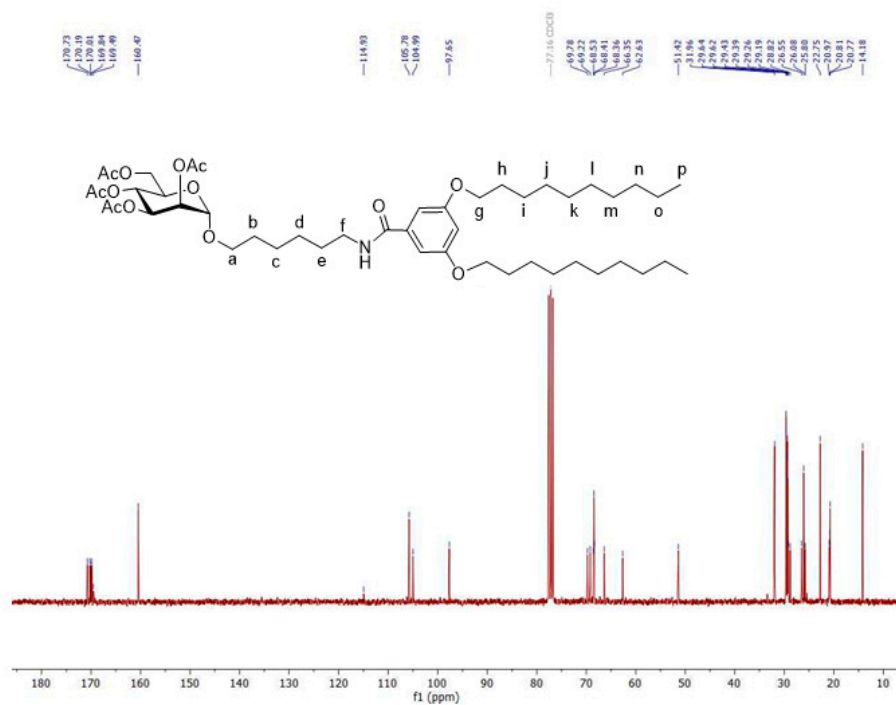

**Figure S3.** <sup>13</sup>C-NMR (75 MHz, CDCl<sub>3</sub>) of compound 17.

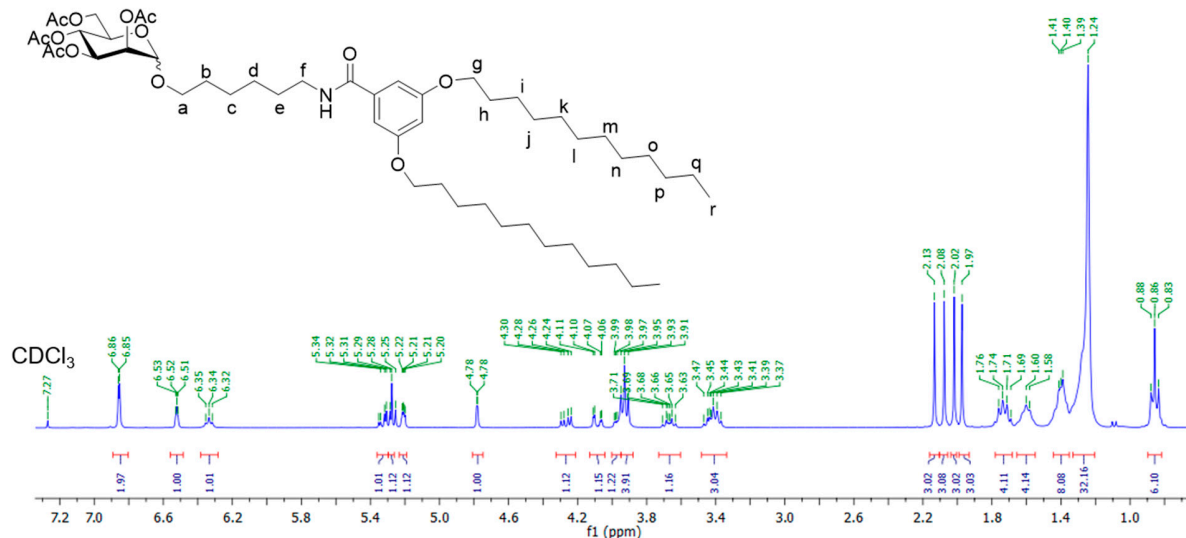

**Figure S4.** <sup>1</sup>H-NMR (300 MHz, CDCl<sub>3</sub>) of compound 18.

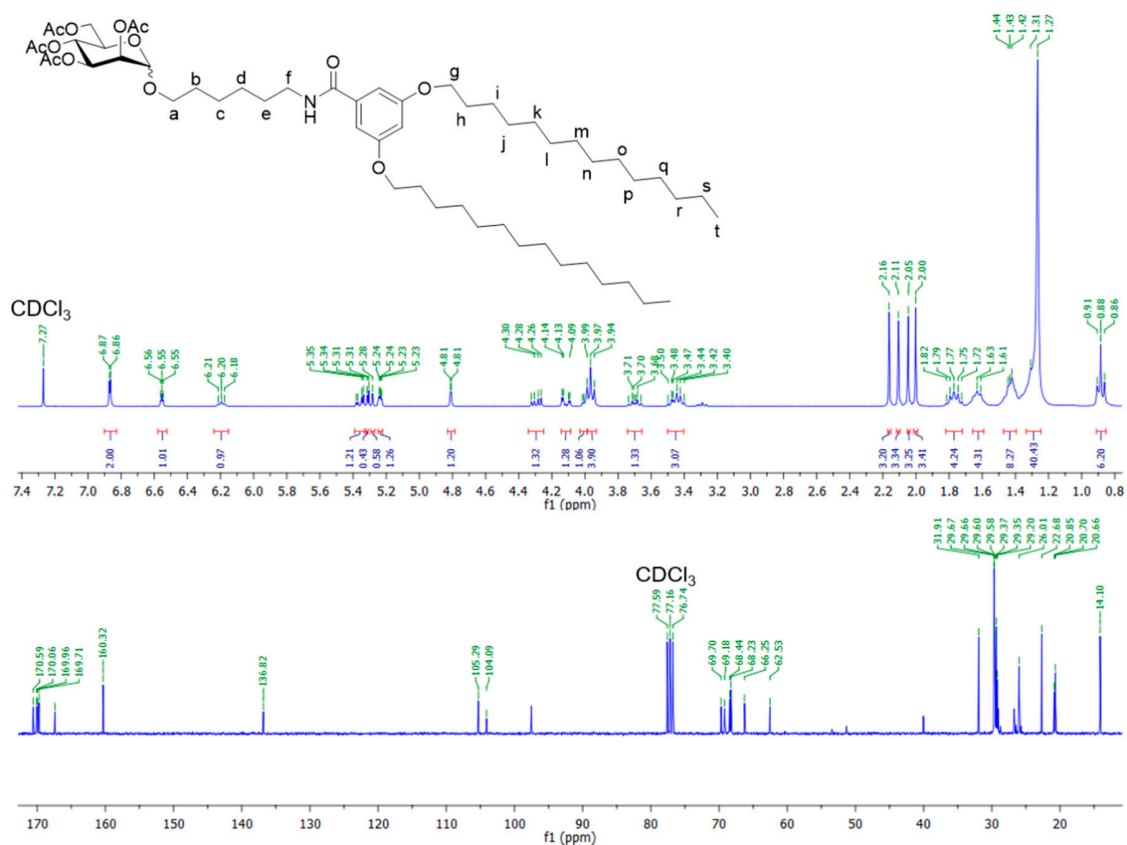

**Figure S5.** <sup>1</sup>H-NMR and <sup>13</sup>C-NMR (300 and 75 MHz, CDCl<sub>3</sub>) of compound 19.

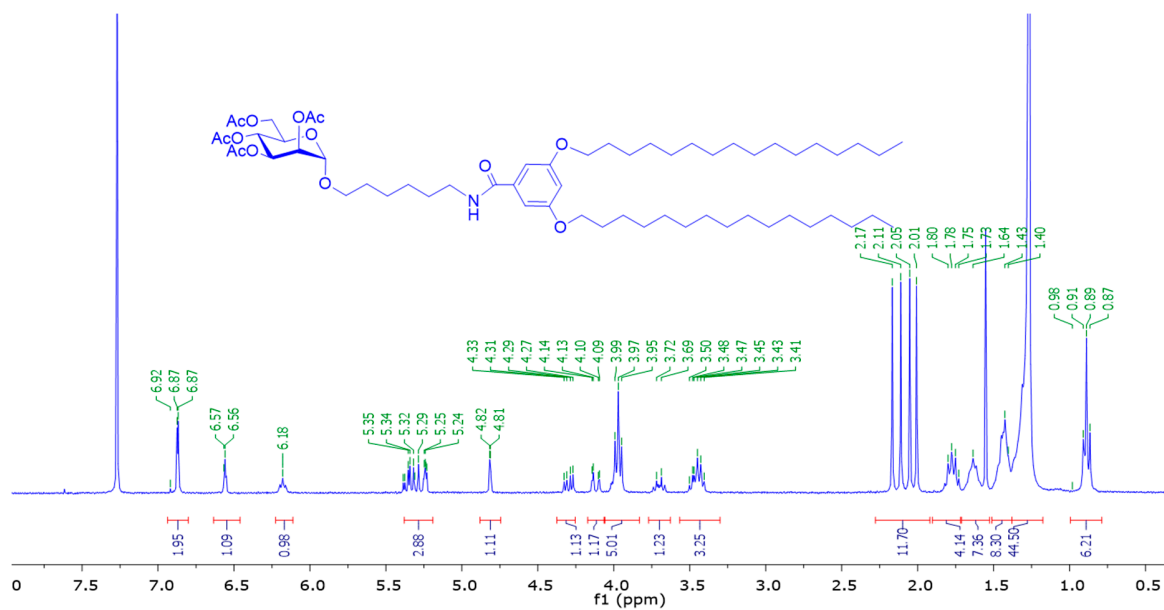

**Figure S6.** <sup>1</sup>H-NMR (300 MHz, CDCl<sub>3</sub>) of compound **20**.

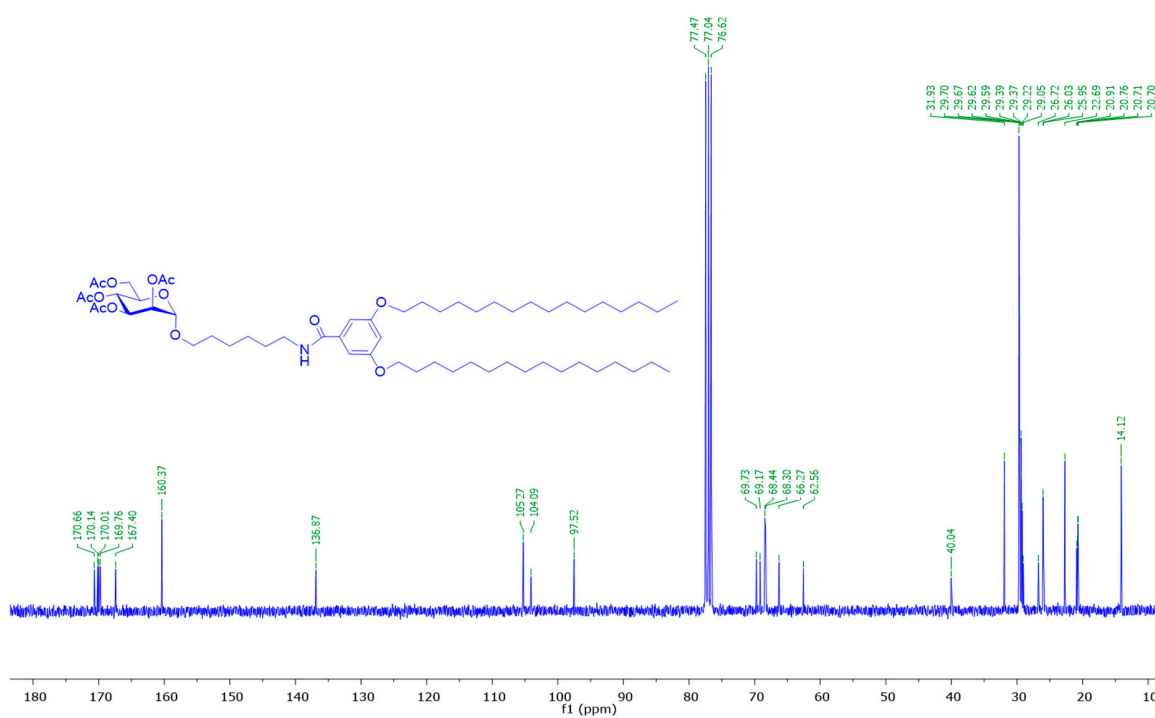

**Figure S7.** <sup>13</sup>C-NMR (75 MHz, CDCl<sub>3</sub>) of compound **20**.

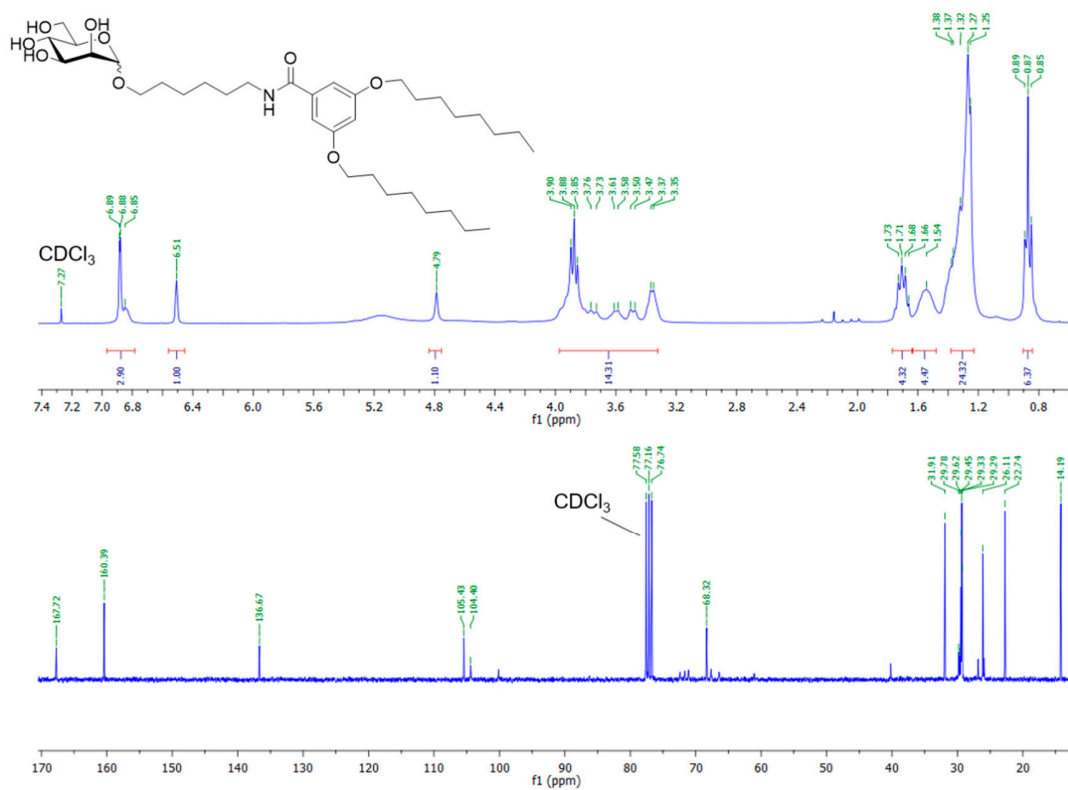

**Figure S8.** <sup>1</sup>H-NMR and <sup>13</sup>C-NMR (300 and 75 MHz, CDCl<sub>3</sub>) of compound **21**.

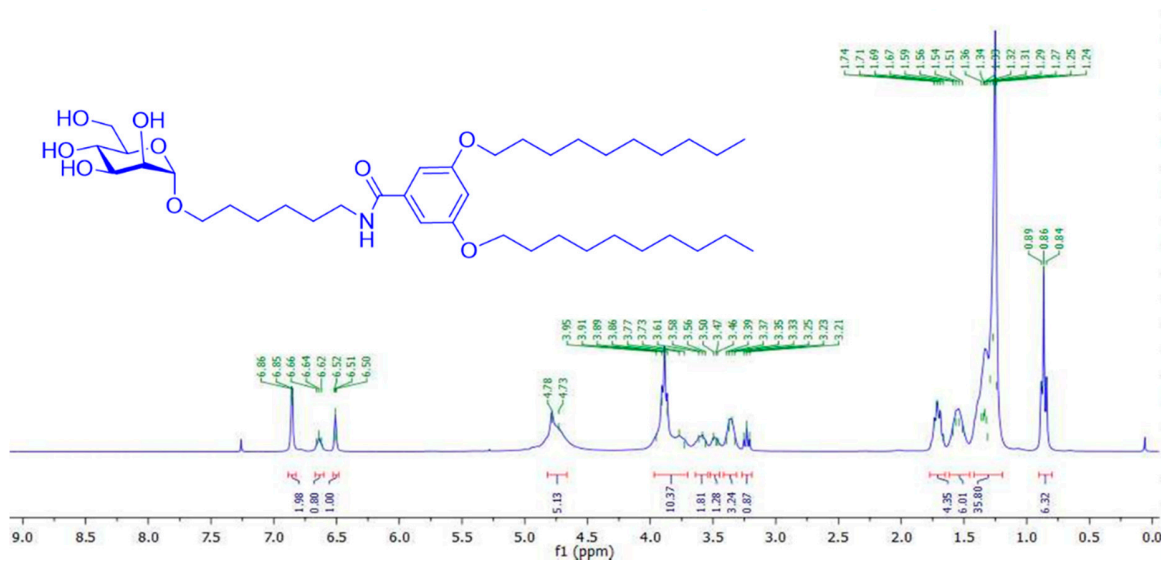

**Figure S9.** <sup>1</sup>H-NMR (300 MHz, CDCl<sub>3</sub>) of compound **22**.

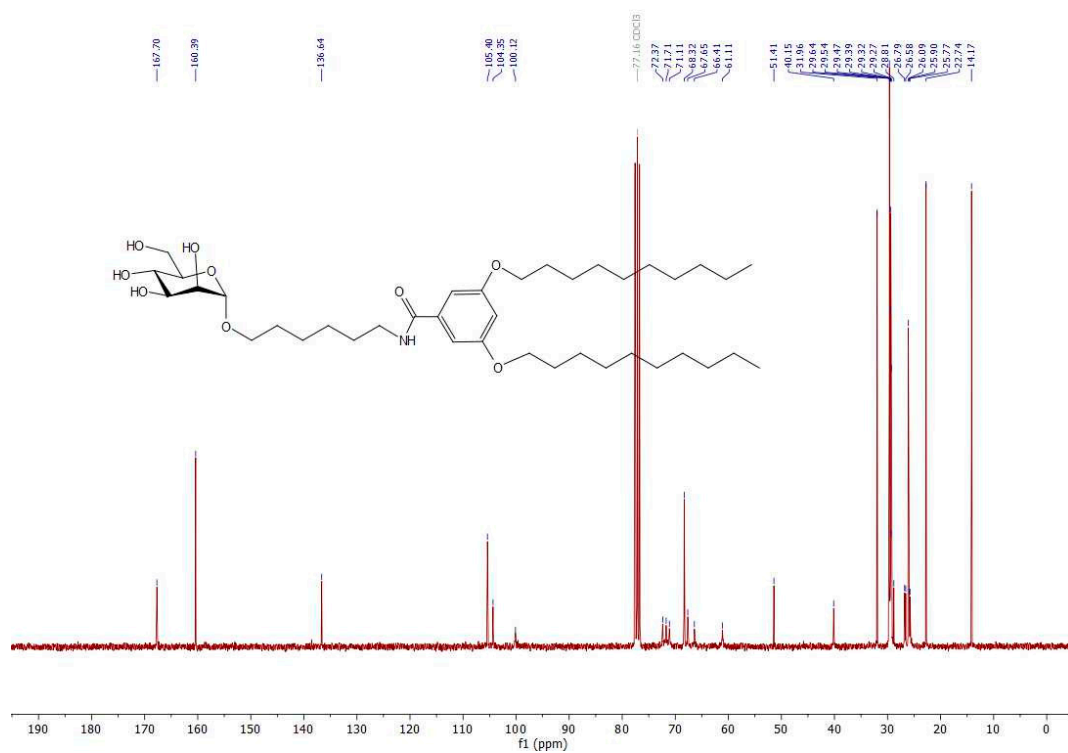

Figure S10. <sup>13</sup>C-NMR (75 MHz, CDCl<sub>3</sub>) of compound 22.

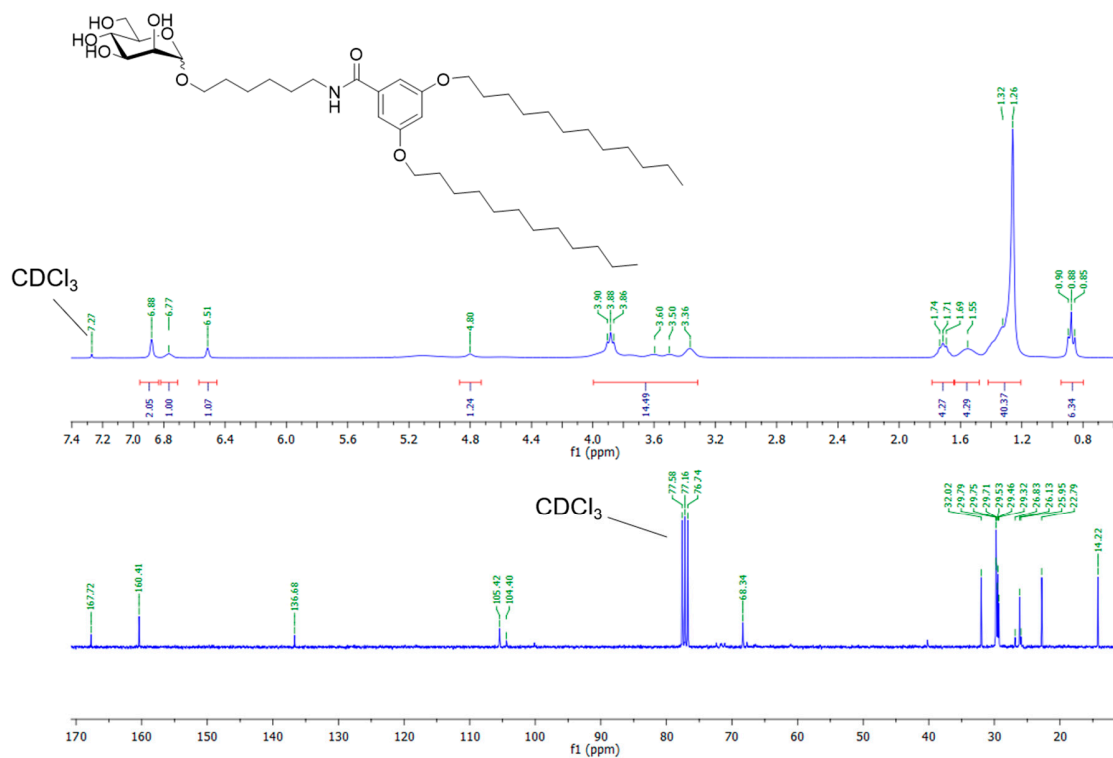

Figure S11. <sup>1</sup>H-NMR and <sup>13</sup>C-NMR (75 MHz, CDCl<sub>3</sub>) of compound 23.

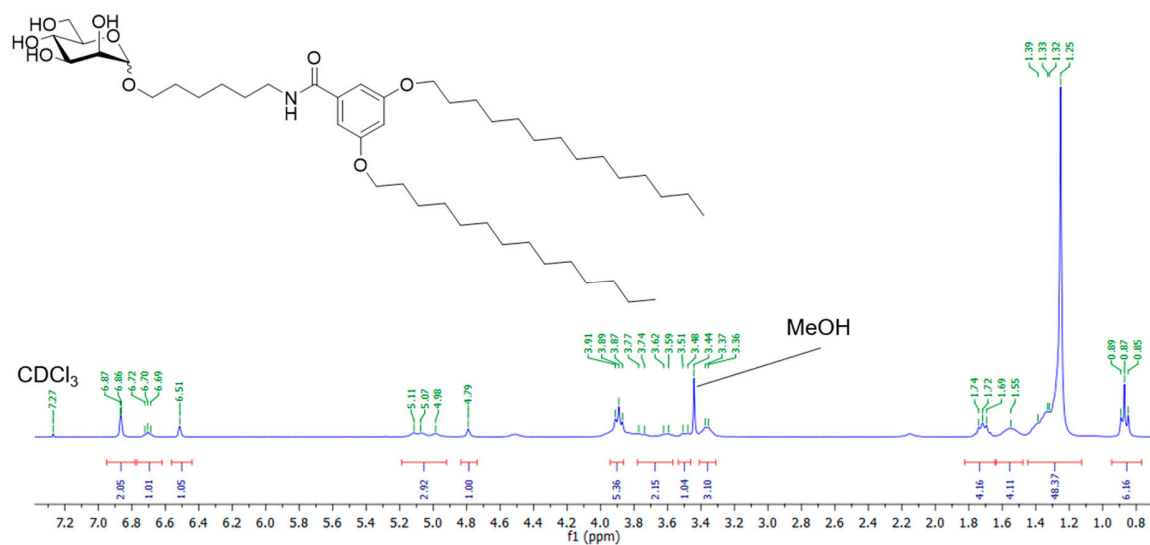

**Figure S12.** <sup>1</sup>H-NMR (300 MHz, CDCl<sub>3</sub>) of compound 24.

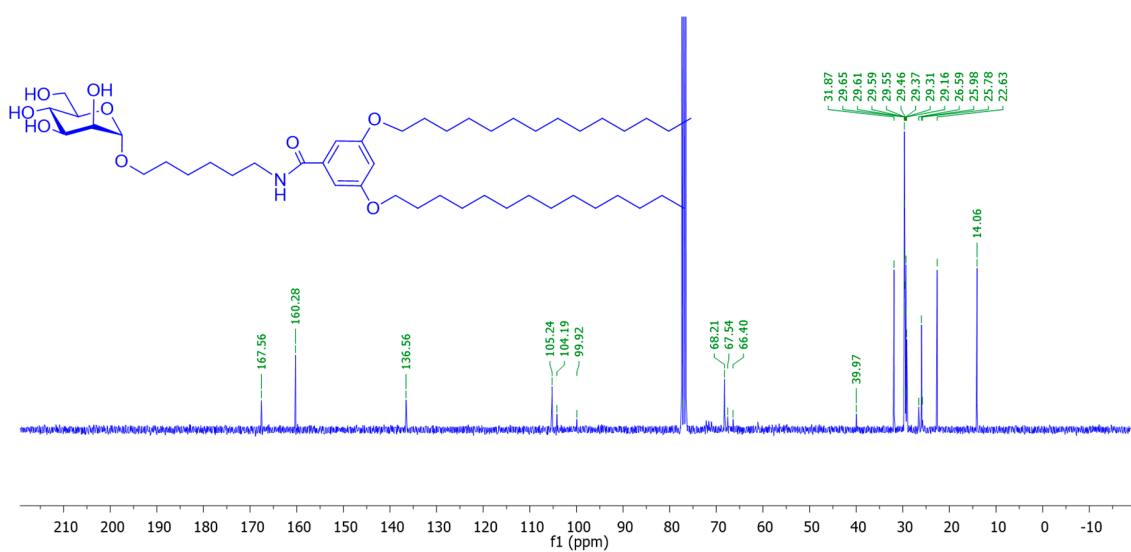

**Figure S13.** <sup>13</sup>C-NMR (300 MHz, CDCl<sub>3</sub>) of compound 24.

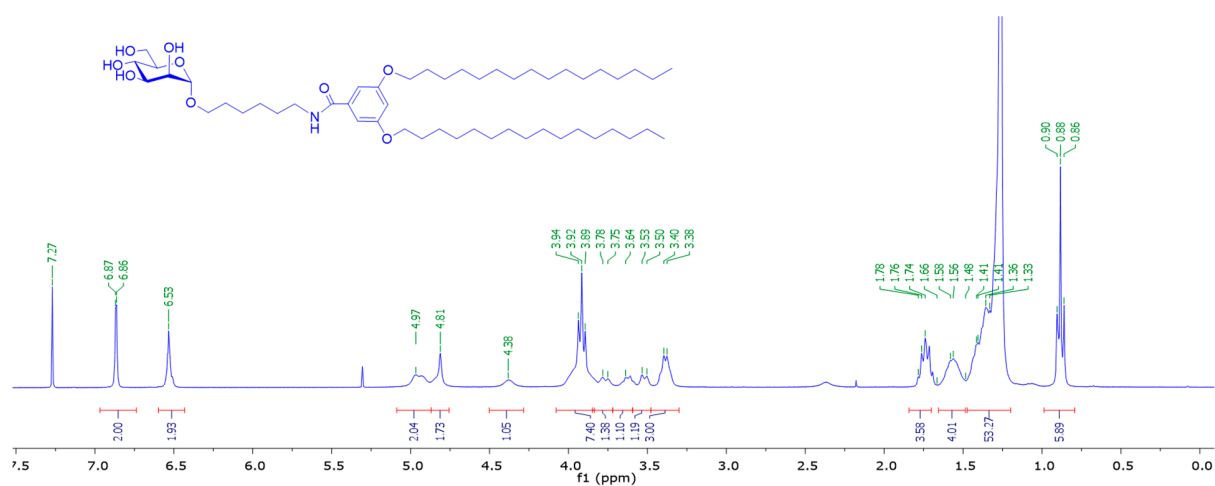

**Figure S14.** <sup>1</sup>H-NMR (300 MHz, CDCl<sub>3</sub>) of compound **25**.

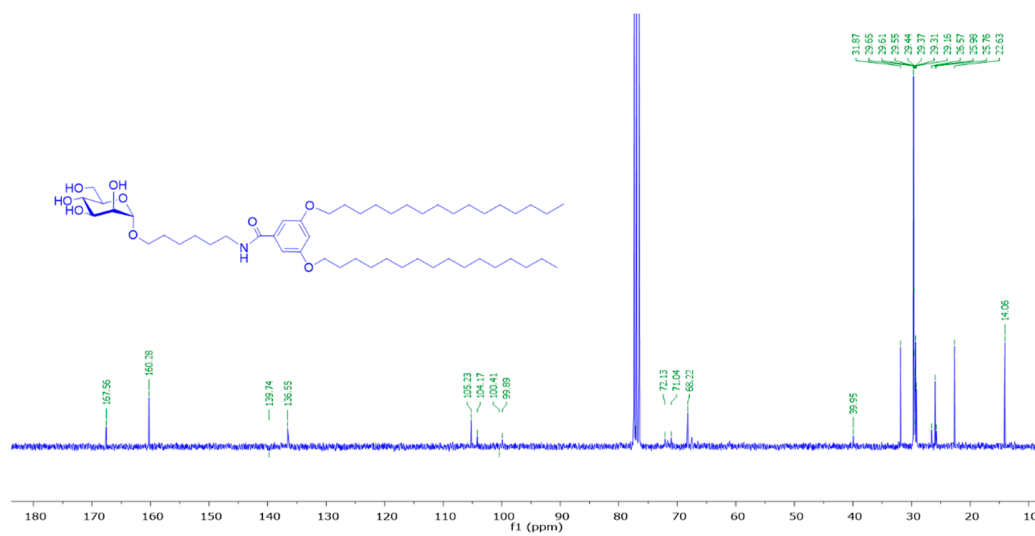

**Figure S15.** <sup>13</sup>C-NMR (75 MHz, CDCl<sub>3</sub>) of compound **25**.
